# Supplementary material
Source: HighWire-hosted journal article supplement (https://mentalhealth.bmj.com/content/24/1/e2)
Supplement: inline-supplementary-material-1 [file inline-supplementary-material-1.pdf]

**Appendix 1. Qualitative Interviews Participants**

|     | Age<br>(years) | Gender | Marital<br>Status               | Education<br>Employment                             | Living With                      | Mental health diagnosis                                  | Number<br>of<br>Attempts | Number of<br>Hospital<br>Admission<br>s |
|-----|----------------|--------|---------------------------------|-----------------------------------------------------|----------------------------------|----------------------------------------------------------|--------------------------|-----------------------------------------|
| 1.  | 23             | M      | Unmarried                       | Graduate                                            | Parents & sibling                | No diagnosis                                             | 2                        | 1                                       |
| 2.  | 17             | M      | Unmarried                       | School grade 10 dropout                             | Parents                          | Cluster B personality traits, Conduct Disorder           | 1                        | 1                                       |
| 3.  | 17             | F      | Unmarried                       | In school                                           | Parents                          | Premenstrual dysphoric disorder                          | 1                        | 0                                       |
| 4.  | 15             | F      | Unmarried                       | In school                                           | In residential accommodation     | Oppositional defiant disorder, Major depressive disorder | 1                        | 0                                       |
| 5.  | 16             | F      | Unmarried                       | School grade 9 dropout                              | Parents and siblings             | Cluster B personality traits, Learning disability        | 1                        | 1                                       |
| 6.  | 19             | F      | Unmarried                       | School grade 11 dropout                             | Parents and siblings             | Conversion disorder, Generalised Anxiety Disorder        | 4                        | 1                                       |
| 7.  | 24             | M      | Married                         | Graduate Works as peon                              | Disabled father, mother and wife | Cluster B personality traits                             | 2                        | 1                                       |
| 8.  | 23             | M      | Engaged                         | Graduate Unemployed                                 | Father                           | Obsessive compulsive disorder, Major depressive disorder | 2                        | 0                                       |
| 9.  | 18             | F      | Unmarried                       | In college                                          | Parents, sibling                 | No diagnosis                                             | 1                        | 1                                       |
| 10. | 19             | F      | Married, Estranged from husband | School grade 8 drop-out Works as personal caretaker | Mother                           | Major depressive disorder, Post traumatic disorder       | 2                        | 1                                       |
| 11. | 20             | F      | Engaged                         | Finished grade 12                                   | Parents                          | No diagnosis                                             | 1                        | 1                                       |

|     |    |   |           |                                         |                           |                                                    |   |   |
|-----|----|---|-----------|-----------------------------------------|---------------------------|----------------------------------------------------|---|---|
| 12. | 22 | F | Unmarried | Studying in college                     | Parents                   | Alcohol dependence, Post-traumatic stress disorder | 5 | 3 |
| 13. | 22 | M | Unmarried | Shopkeeper                              | Roommate                  | Alcohol dependence, Cluster B personality traits   | 3 | 1 |
| 14. | 20 | F | Divorced  | Grade 9 dropout                         | Brother and sister in law | No diagnosis                                       | 1 | 1 |
| 15. | 22 | F | Unmarried | Graduate, enrolled in a computer course | Parents                   | Recurrent depressive disorder, Social phobia       | 2 | 1 |

**Appendix 2: Intervention Development Workshop 1 Participants****Professionals' Workshop**

| Profession                | Gender | Years of Experience | Current Role                                                                         |
|---------------------------|--------|---------------------|--------------------------------------------------------------------------------------|
| Psychiatrist              | M      | Over 30 years       | Head of Department, Psychiatry, Tertiary Level Public Hospital, Mumbai               |
| Clinical Psychologist     | F      | Over 25 years       | Head of Department, Psychology, Tertiary Level Public Hospital, Mumbai               |
| Clinical Psychologist     | F      | Over 7 years        | Private Practice, Mumbai                                                             |
| Clinical Psychologist     | F      | 1 year              | Private Practice, Mumbai                                                             |
| Psychiatric Social Worker | F      | Over 20 years       | School Counsellor in a reputed school, Mumbai dealing with 12 to 18 year adolescents |

**Youth Workshop**

| Age | Gender | Psychiatric Diagnosis                                    | Number of Attempts | Number of Hospital Admissions |
|-----|--------|----------------------------------------------------------|--------------------|-------------------------------|
| 22  | F      | No diagnosis                                             | 1                  | 1                             |
| 15  | F      | Oppositional defiant disorder, major depressive disorder | 1                  | 0                             |
| 23* | M      | Obsessive compulsive disorder, major depressive disorder | 2                  | 0                             |
| 22* | F      | Alcohol dependence, post-traumatic stress disorder       | 5                  | 3                             |
| 19* | F      | No diagnosis                                             | 1                  | 1                             |
| 19* | F      | Recurrent depressive disorder, social phobia             | 2                  | 1                             |

\*Participated in 2<sup>nd</sup> youth intervention development workshop during step 5

### Appendix 3: Intervention Development Workshop 2 Participants

#### Professionals' Workshop

| Profession            | Gender | Years of Experience | Current Role                                                    |
|-----------------------|--------|---------------------|-----------------------------------------------------------------|
| Clinical Psychologist | F      | 15 years            | Private Practice, Mumbai                                        |
| Clinical Psychologist | F      | 10 years            | Counsellor in a college, Mumbai dealing with 17 to 23 years old |
| Clinical Psychologist | F      | 5 years             | Private Practice, Mumbai                                        |
| Clinical Psychologist | F      | 1 year              | Private Practice, Mumbai                                        |
| Clinical Psychologist | F      | 3 years             | Working with a non-government organisation, Mumbai              |

#### Youth Workshop

| Age | Gender | Psychiatric Diagnosis                                       | Number of Attempts | Number of Hospital Admissions |
|-----|--------|-------------------------------------------------------------|--------------------|-------------------------------|
| 23* | M      | Obsessive compulsive disorder, major depressive disorder    | 2                  | 0                             |
| 22* | F      | Alcohol dependence, post-traumatic stress disorder          | 5                  | 3                             |
| 19* | F      | No diagnosis                                                | 1                  | 1                             |
| 19* | F      | Recurrent depressive disorder, social phobia                | 2                  | 1                             |
| 18  | M      | Cluster B personality traits, Recurrent depressive disorder | 2                  | 1                             |
| 17  | F      | Adjustment disorder, brief psychotic episode in remission   | 2                  | 2                             |
| 17  | M      | Oppositional defiant disorder, cluster B personality traits | 1                  | 1                             |

\*Participated in 1<sup>st</sup> youth intervention development workshop during step 3
